# Supplementary material for: Long-Term Follow-Up of Oral Glucose Tolerance Test–Derived Glucose Tolerance and Insulin Secretion and Insulin Sensitivity Indexes in Subjects With Glucokinase Mutations (MODY2)
Source: PubMed Central journal article supplement — Diabetes Care. 2008 Jul;31(7):1321–3. doi: 10.2337/dc07-2017 (PMC2453674; doi:10.2337/dc07-2017), 2008-07
Supplement: dc07-2017_1.pdf [file dc07-2017_1.pdf]

## FOR ONLINE APPENDIX ONLY

**ONLINE APPENDIX TABLE 1: GLUCOKINASE MUTATIONS DETECTED IN THE PARTICIPANTS**

| GCK MUTATION           | SUBJECTS (N) |
|------------------------|--------------|
| c.292C>T (Q98X)        | 2            |
| c.483+1_483+2delGT     | 1            |
| c.483+2_483+16del      | 1            |
| c.523G>A (G175R)*      | 5            |
| c.571C>T (R191W)       | 3            |
| c.676G>A (V226M)       | 2            |
| c.680-2A>T             | 3            |
| c.731delT (V244fsdelT) | 1            |
| c.781G>A (G261R)       | 3            |
| c.898G>A (E300K)       | 1            |
| c.898G>C (E300Q)       | 8            |
| c.1007C>T (S336L)      | 1            |
| c.1240A>G (K414E)      | 2            |

\*Mutation detected in two different kindred

**ONLINE APPENDIX TABLE 2: CLINICAL PROFILE OF MODY2 SUBJECTS  
ACCORDING TO GLUCOSE TOLERANCE EVOLUTION DURING FOLLOW-UP**

|                                              | Glucose Tolerance (AUC <sub>glucose</sub> ) |              | p       |
|----------------------------------------------|---------------------------------------------|--------------|---------|
|                                              | Stable                                      | Deteriorated |         |
| n                                            | 16                                          | 17           |         |
| Sex (M/F)                                    | 44% / 56%                                   | 53% / 47%    | 0.73    |
| Duration of follow-up (years)                | 8 ± 1                                       | 14 ± 2       | 0.007   |
| Age at 2 <sup>nd</sup> OGTT (years)          | 27 ± 4                                      | 38 ± 4       | 0.02    |
| ΔBMI (z score differences)                   | 0.10 ± 0.17                                 | 0.37 ± 0.16  | 0.28    |
| ΔAUC <sub>glucose</sub> (%)                  | -8 ± 2                                      | 21 ± 3       | <0.0001 |
| ΔAUC <sub>insulin</sub> (%) <sup>*</sup>     | -3 ± 11                                     | 23 ± 10      | 0.09    |
| ΔHOMA%B (%) <sup>*</sup>                     | 6 ± 10                                      | 16 ± 10      | 0.49    |
| ΔHOMA%S (%) <sup>*</sup>                     | 18 ± 15                                     | -27 ± 12     | 0.04    |
| Systolic Blood Pressure (mmHg) <sup>†</sup>  | 119 ± 3                                     | 124 ± 4      | 0.33    |
| Diastolic Blood Pressure (mmHg) <sup>†</sup> | 77 ± 3                                      | 76 ± 2       | 0.57    |
| Creatinine Clearance (ml/min) <sup>†</sup>   | 89 ± 8                                      | 93 ± 8       | 0.85    |
| Triglycerides (mmol/l) <sup>†</sup>          | 0.97 ± 0.10                                 | 1.27 ± 0.19  | 0.21    |
| LDL-cholesterol (mmol/l) <sup>†</sup>        | 3.11 ± 0.20                                 | 3.93 ± 0.18  | 0.009   |
| HDL-cholesterol (mmol/l) <sup>†</sup>        | 1.49 ± 0.20                                 | 1.38 ± 0.12  | 0.62    |
| Proteinuria (n) <sup>†,‡</sup>               | 0                                           | 0            | -       |
| Proliferative Retinopathy (n) <sup>†</sup>   | 0                                           | 1            | -       |

Data expressed as Mean ± SEM. Statistics are Fisher's exact test (sex) and analyses of variance performed with log-transformed data when adequate. <sup>\*</sup>Comparison adjusted by sex and age at follow-up. <sup>†</sup>Values at 2<sup>nd</sup> OGTT. <sup>‡</sup>Proteinuria tested by strips (lower limit of detection: ~250 mg/l). Δ: difference between the values at 2<sup>nd</sup> and 1<sup>st</sup> OGTTs, expressed

as a percent of the value at 1<sup>st</sup> OGTT, except for  $\Delta$ BMI expressed as Z-score differences.

AUC: area under the curve.

## FIGURES

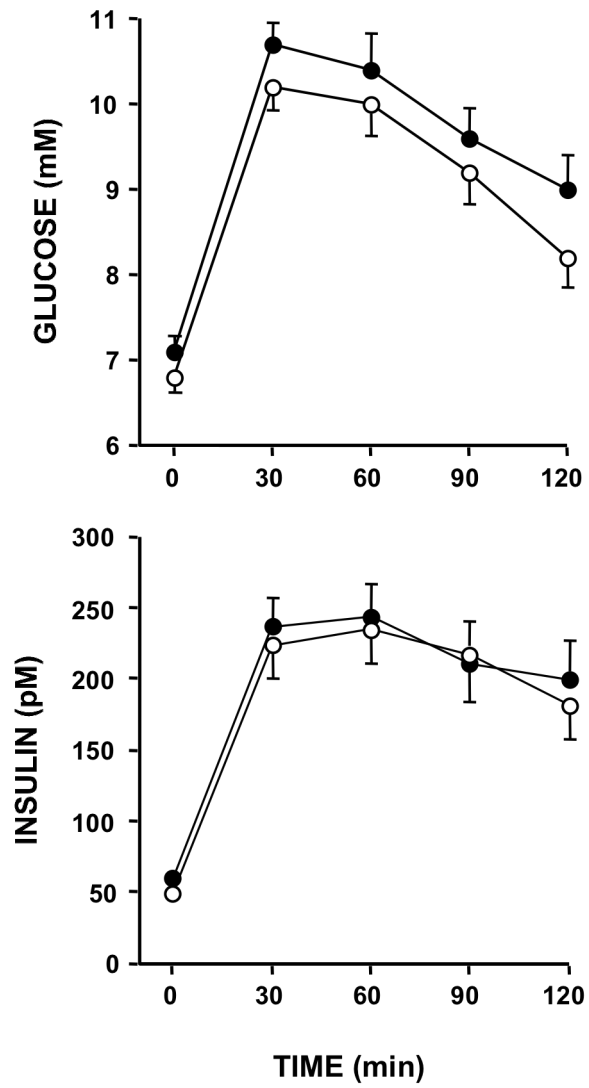

**Online Appendix Figure 1.** Plasma glucose and insulin levels during oral glucose tolerance tests (OGTT) in MODY2 subjects. Open circles: 1<sup>st</sup> OGTT; closed circles: 2<sup>nd</sup> OGTT. Data expressed as mean  $\pm$  SEM.

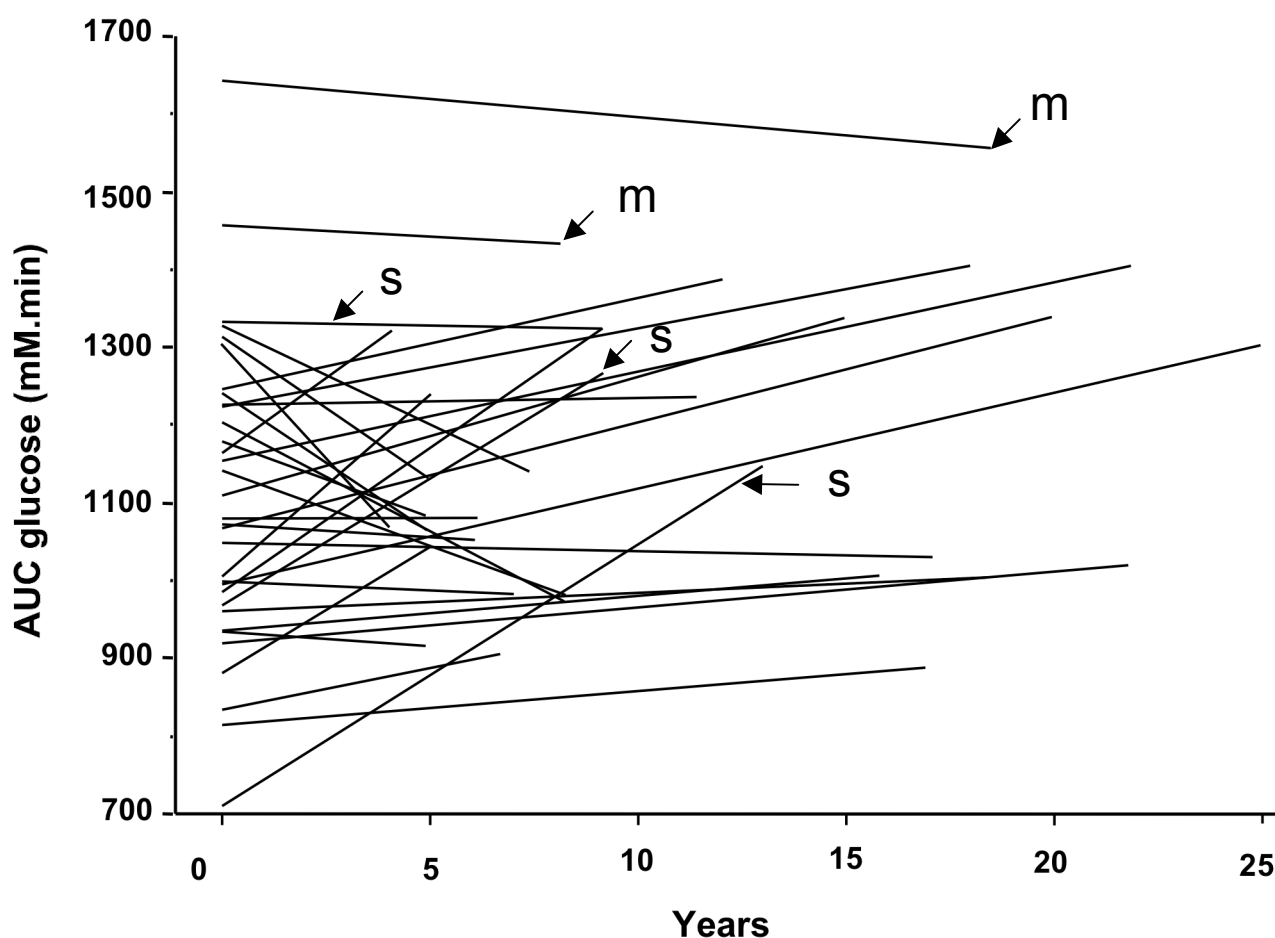

**Online Appendix Figure 2.** Evolution of glucose tolerance during the follow-up period.

Glucose tolerance is expressed as the area under the curve relating glucose levels and time during oral glucose tolerance tests ( $AUC_{glu}$ ). Lines connect values for the same individual at 1<sup>st</sup> and 2<sup>nd</sup> OGTT. Arrows indicate subjects receiving metformin (m) or sulfonylurea (s) at follow-up. Subjects receiving sulfonylurea had decreased insulin secretion (HOMA%B 26%, 33% and 73%) with preserved insulin sensitivity (HOMA%S 140%, 207%, 125%), while subjects receiving metformin had preserved insulin secretion (HOMA%B 110%, 102%) with decreased insulin sensitivity (HOMA%S 25%, 44%) at the second OGTT.
